# Supplementary material
Source: publisher figshare collection journal article supplement (https://sage.figshare.com/ndownloader/files/14074346)
Supplement: Supplementary file 1 [file 14074346]

## Supplements

### 1) Items of palliative knowledge of physicians with rotation in palliative care (PR) and board certified specialists (BCS) without experience in palliative care

| Item of palliative knowledge                                                                                                                                                          | Number of physicians with correct answer |              |           | I don't know |            |            | Number of physicians with wrong answers |            |            |
|---------------------------------------------------------------------------------------------------------------------------------------------------------------------------------------|------------------------------------------|--------------|-----------|--------------|------------|------------|-----------------------------------------|------------|------------|
|                                                                                                                                                                                       | total                                    | PR           | BCS       | total        | PR         | BCS        | total                                   | PR         | BCS        |
| Palliative care is synonymous with caring for the dying.                                                                                                                              | 94%<br>n=31                              | 94%<br>n=16  | 94% n=15  | -            | -          | -          | 6% n=2                                  | 6%<br>n=1  | 6%<br>n=1  |
| Palliative patients may refuse any medically indicated measure                                                                                                                        | 94%<br>n=31                              | 94%<br>n=16  | 94% n=15  | 3% n=1       | -          | 6%<br>n=1  | 3% n=1                                  | 6%<br>n=1  | -          |
| In the case of intense tumour pain, an opioid of stage 3 of WHO stage therapy is used from the beginning to treat the pain.                                                           | 55%<br>n=18                              | 76%<br>n=13  | 60% n=9   | 6% n=2       | -          | 13%<br>n=2 | 39%<br>n=13                             | 24%<br>n=4 | 31%<br>n=5 |
| In the initial prescription of opioids, all non-opioid analgesics should be discontinued.                                                                                             | 97%<br>n=32                              | 100%<br>n=17 | 94% n=15  | 3% n=1       | -          | 6%<br>n=1  | -                                       | -          | -          |
| Hydromorphone can be safely used in the case of patients with renal failure                                                                                                           | 67%<br>n=22                              | 88%<br>n=15  | 44% n=7   | 24% n=8      | -          | 50%<br>n=8 | 9% n=3                                  | 12%<br>n=2 | 6%<br>n=1  |
| Opioids are used against pain peaks in a dose of 5% of the daily dose                                                                                                                 | 76%<br>n=25                              | 88%<br>n=15  | 56% n=9   | 15% n=5      | -          | 31%<br>n=4 | 9% n=3                                  | 12%<br>n=2 | 13%<br>n=2 |
| Since no tolerance develops in opioid-induced nausea, all patients should be prescribed an antiemetic.                                                                                | 82%<br>n=27                              | 88%<br>n=15  | 75% n=12  | 6% n=2       | -          | 13%<br>n=2 | 12% n=4                                 | 12%<br>n=2 | 13%<br>n=2 |
| If the analgesic effect is insufficient, the previous daily dose of the opioid should be increased by 10%.                                                                            | 67% n=22                                 | 76%<br>n=13  | 56% n=9   | 12% n=4      | -          | 25%<br>n=4 | 21% n=7                                 | 24%<br>n=4 | 19%<br>n=3 |
| If side effects make a further increase of an opioid appear difficult, an opioid rotation should be considered.                                                                       | 94% n=31                                 | 100%<br>n=17 | 88% n=14  | 6% n=2       | -          | 13%<br>n=2 | -                                       | -          | -          |
| About 10% of all patients whose pain is well controlled with basic therapy have breakthrough pain.                                                                                    | 33%<br>n=11                              | 41%<br>n=7   | 25% n=4   | 39%<br>n=13  | 24%<br>n=4 | 56%<br>n=9 | 28% n=9                                 | 35%<br>n=6 | 20%<br>n=3 |
| Invasive dental treatment should be avoided during bisphosphonate therapy.                                                                                                            | 64%<br>n=21                              | 59%<br>n=10  | 69% n=11  | 12% n=4      | 6%<br>n=1  | 19%<br>n=3 | 24% n=8                                 | 35%<br>n=6 | 13%<br>n=2 |
| More than 80% of patients taking opioids experience nausea or vomiting.                                                                                                               | 48%<br>n=16                              | 71%<br>n=12  | 25% n=4   | 15% n=5      | 6%<br>n=1  | 25%<br>n=4 | 33%<br>n=11                             | 18%<br>n=3 | 50%<br>n=8 |
| Because most people who take opioids suffer under constipation, it is necessary to use laxatives in the concomitant medication.                                                       | 100%<br>n=33                             | -            | -         | -            | -          | -          | -                                       | -          | -          |
| Less than 0.2% of tumour patients who receive opioids for pain therapy under controlled conditions, develop an addiction.                                                             | 60%<br>n=20                              | 77%<br>n=13  | 21% n=7   | 24% n=8      | 18%<br>n=3 | 31%<br>n=5 | 15% n=5                                 | 6%<br>n=1  | 25%<br>n=4 |
| If someone has respiratory distress, the arterial oxygen partial pressure is below 60 mmHg                                                                                            | 76%<br>n=25                              | 82%<br>n=14  | 69% n=11  | 15% n=5      | 12%<br>n=2 | 19%<br>n=3 | 6% n=2                                  | -          | 13%<br>n=2 |
| Morphine relieves breathlessness.                                                                                                                                                     | 94%<br>n=31                              | 100%<br>n=17 | 88% n=14  | 6% n=2       | -          | 13%<br>n=2 | -                                       | -          | -          |
| Patients with respiratory distress often experience relief when the room temperature will be increased.                                                                               | 76%<br>n=25                              | 94%<br>n=16  | 56% n=9   | 21% n=7      | 6%<br>n=1  | 38%<br>n=6 | 3% n=1                                  | -          | 6%<br>n=1  |
| Dopamine, histamine, acetylcholine and serotonin are neurotransmitters in the vomiting center.                                                                                        | 91%<br>n=30                              | 94%<br>n=16  | 88% n=14  | 3% n=1       | -          | 6%<br>n=1  | 6% n=2                                  | 6%<br>n=1  | 6%<br>n=1  |
| If the main cause of nausea is hypercalcemia, the administration of a bisphosphonate is effective in relieving nausea.                                                                | 60%<br>n=20                              | 65%<br>n=11  | 56% n=9   | 27% n=9      | 12%<br>n=2 | 44%<br>n=7 | 12% n=4                                 | 24%<br>n=4 | -          |
| If no more fluid is administered in the dying process, one speaks of active euthanasia.                                                                                               | 97%<br>n=32                              | 100%<br>n=17 | 94% n=15  | 3% n=1       | -          | 6%<br>n=1  | -                                       | -          | -          |
| Expressing the wish to die does not exclude the will to live.                                                                                                                         | 91%<br>n=30                              | 94%<br>n=16  | 88% n=14  | 6% n=2       | 6%<br>n=1  | 6%<br>n=1  | 3% n=1                                  | -          | 6%<br>n=1  |
| An anxiolytic is one of the most helpful drugs for high psychological distress.                                                                                                       | 91%<br>n=30                              | 88%<br>n=15  | 94% n=15  | 3% n=1       | 6%<br>n=1  | 6%<br>n=1  | 6% n=2                                  | 6%<br>n=1  | -          |
| Benzodiazepines are the medication of choice for symptoms of a delirium.                                                                                                              | 67%<br>n=22                              | 77%<br>n=13  | 56% n=9   | 3% n=1       | -          | 6%<br>n=1  | 30%<br>n=10                             | 24%<br>n=4 | 38%<br>n=6 |
| It is helpful to darken the room for a delirious patient so that he can sleep well.                                                                                                   | 42%<br>n=14                              | 47%<br>n=8   | 38% n=6   | 18% n=6      | 6%<br>n=1  | 31%<br>n=5 | 39%<br>n=13                             | 47%<br>n=8 | 31%<br>n=5 |
| In the case of patients with brain metastases, it is advisable to discuss the possibility of an epileptic seizure with their relatives and to prescribe an anticonvulsant medication. | 94%<br>n=31                              | 94%<br>n=16  | 94% n=15  | -            | -          | -          | 6% n=2                                  | 6%<br>n=1  | 6%<br>n=1  |
| When physicians give bad news, they should check the patients' understanding of the disease and their concerns.                                                                       | 100%<br>n=33                             | 100%<br>n=33 | 100% n=33 | -            | -          | -          | -                                       | -          | -          |
| In a medical consultation about a malignant disease, it is advisable to use the word "cancer" repeatedly.                                                                             | 45%<br>n=15                              | 41%<br>n=7   | 50% n=8   | 6% n=2       | 12%<br>n=2 | -          | 48%<br>n=16                             | 47%<br>n=8 | 50%<br>n=8 |

|                                                                                                                         |              |              |           |        |            |            |             |            |            |
|-------------------------------------------------------------------------------------------------------------------------|--------------|--------------|-----------|--------|------------|------------|-------------|------------|------------|
| Hospice work is synonymous with caring for the dying                                                                    | 70%<br>n=23  | 76%<br>n=13  | 63% n=10  | -      | -          | -          | 30%<br>n=10 | 24%<br>n=4 | 38%<br>n=6 |
| Body language is an important aspect of communication when talking to patients.                                         | 100%<br>n=33 | 100%<br>n=17 | 100% n=16 | -      | -          | -          | -           | -          | -          |
| After the death of the patient, the support of a hospice service is completed.                                          | 91%<br>n=30  | 94%<br>n=16  | 88% n=14  | 6% n=2 | -          | 13%<br>n=2 | 3% n=1      | 6%<br>n=1  | -          |
| The possibility of accompanying a patient by a hospice service makes the patient afraid and can lead to a loss of hope. | 73%<br>n=24  | 77%<br>n=13  | 63% n=10  | 9% n=3 | 12%<br>n=2 | 6%<br>n=1  | 18% n=6     | 12%<br>n=2 | 25%<br>n=4 |
| The control of physical symptoms is done by medical measures and is not a task of hospice work.                         | 73%<br>n=24  | 59%<br>n=10  | 88% n=14  | 3% n=1 | -          | 6%<br>n=1  | 24% n=8     | 41%<br>n=7 | 6%<br>n=1  |
| When a patient claims to want to die, he is at risk of suicide.                                                         | 94%<br>n=31  | 94%<br>n=16  | 94% n=15  | 6% n=2 | -          | 6%<br>n=1  | -           | 6%<br>n=1  | -          |

## 2) Items of palliative self-efficacy Expectation of physicians with rotation in palliative care (PR) and board certified specialists (BCS) without experience in palliative care

| I think I'm able...                                                                                          | PR, n=17       |       |          |                   | BCS n=16       |       |          |                   |
|--------------------------------------------------------------------------------------------------------------|----------------|-------|----------|-------------------|----------------|-------|----------|-------------------|
|                                                                                                              | strongly agree | agree | disagree | Strongly disagree | strongly agree | agree | disagree | Strongly disagree |
| to collect data that describe the pain of a patient in a differentiated way.                                 | 11             | 6     | -        | -                 | 9              | 6     | 1        | -                 |
| to treat nausea according to its cause.                                                                      | 10             | 7     | -        | -                 | 5              | 9     | 2        | -                 |
| to present the regional offers of specialised palliative care.                                               | 8              | 8     | 1        | -                 | 1              | 5     | 7        | 3                 |
| to convince a colleague of the need for palliative support.                                                  | 10             | 7     | -        | -                 | 5              | 8     | 3        | -                 |
| to recognize psychosocial problems and to discuss them with patients and relatives                           | 9              | 7     | 1        | -                 | 6              | 10    | -        | -                 |
| to organize mediation to hospice and palliative services                                                     | 11             | 6     | -        | -                 | 3              | 8     | 5        | -                 |
| to recognize fear, to treat it and to alleviate it through a calm atmosphere of conversation.                | 11             | 6     | -        | -                 | 8              | 7     | 1        | -                 |
| to recognize the complex needs of a dying person and to react appropriately to them.                         | 8              | 8     | 1        | -                 | 4              | 11    | 1        | -                 |
| to offer a suitable treatment concept for pain according to its pathogenesis and quality.                    | 11             | 6     | -        | -                 | 6              | 8     | 2        | -                 |
| to stay in conversation when the wish for euthanasia is expressed.                                           | 12             | 4     | 1        | -                 | 5              | 8     | 3        | -                 |
| to recommend and instruct oral hygiene measures.                                                             | 7              | 7     | 3        | -                 | 5              | 3     | 8        | -                 |
| to discuss possible side effects of the prescribed drugs.                                                    | 10             | 7     | -        | -                 | 8              | 7     | 1        | -                 |
| to recognize and alleviate symptoms of a delirium.                                                           | 6              | 10    | 1        | -                 | 5              | 11    | -        | -                 |
| to integrate cultural and spiritual aspects of dying into the treatment of critically ill people             | 5              | 11    | 1        | -                 | 3              | 9     | 4        | -                 |
| to encounter "difficult" patients and relatives with empathy.                                                | 9              | 8     | -        | -                 | 8              | 7     | 1        | -                 |
| to recognize whether a person suffers, even if the possibilities of communication are limited                | 8              | 8     | 1        | -                 | 9              | 7     | -        | -                 |
| to advise a patient/patient on the basic conditions of the patient's directive and to draft one with him/her | 7              | 7     | 3        | -                 | 4              | 6     | 3        | 3                 |
| to contribute constructively to the supervision and to participate in the further development of my team     | 6              | 9     | 2        | -                 | 6              | 8     | 2        | -                 |
| I was able to gain experience through my rotation, which I can use on further missions.                      | 15             | 2     | -        | -                 | -              | -     | -        | -                 |

3) self-assessment of competence in hospice and palliative care of physicians with rotation in palliative care (PR) and board certified specialists (BCS) without experience in palliative care

| Self-assessment item                                                                                                | PR (n=17)<br>Mean value | BCS (n=16)<br>Mean value | p     |
|---------------------------------------------------------------------------------------------------------------------|-------------------------|--------------------------|-------|
| All in all, I feel safe in the exercise of my medical work.                                                         | 1,76                    | 1,63                     | 0,583 |
| I have reflected in diverse events in my life (grief, illness, death, dying...).                                    | 1,65                    | 1,88                     | 0,666 |
| I am ready to get involved with strong emotions of the dying and relatives.                                         | 1,59                    | 1,75                     | 0,632 |
| I'm able to empathize with the dying and their families.                                                            | 1,71                    | 1,56                     | 0,598 |
| I am familiar with the ethical tension between the voluntary renunciation of nutrition and fluids.                  | 1,65                    | 1,81                     | 0,555 |
| I feel confident in dealing with ethical conflicts between the ethical principles of autonomy and care.             | 1,94                    | 2,56                     | 0,088 |
| I know the limits of my role as a physician.                                                                        | 1,41                    | 1,44                     | 0,950 |
| I can maintain the limitations of my role as a physician.                                                           | 1,76                    | 1,69                     | 0,574 |
| I am aware that I also bring my own fears and wishes into my medical work.                                          | 1,24                    | 1,56                     | 0,118 |
| I feel like part of a multi-professional team.                                                                      | 1,24                    | 1,56                     | 0,502 |
| I am able to handle myself with mindfulness.                                                                        | 2,35                    | 2,19                     | 0,690 |
| I can sense what's good for me and what's harming me.                                                               | 2,24                    | 1,75                     | 0,147 |
| I am aware of my own talents.                                                                                       | 1,94                    | 1,75                     | 0,451 |
| It is difficult for me to talk about ambulatory or stationary hospice services with patients and relatives.*        | 1,35                    | 1,9                      | 0,012 |
| I am familiar with the contents and working methods of hospice work (tasks in office and voluntary work, locations) | 2,18                    | 2,94                     | 0,042 |
| I am familiar with the main contents of the German Hospice and Palliative Act (2015).                               | 2,76                    | 3,56                     | 0,058 |
| I know how the hospice work is initiated to accompany a patient and his relatives.                                  | 2,00                    | 2,94                     | 0,004 |
| I know the structures of hospice and palliative networks                                                            | 1,88                    | 2,94                     | 0,007 |
| I am aware of the legal basis for assisting suicide.                                                                | 2,00                    | 2,44                     | 0,282 |

\*inverse analysis of the question.
